# Supplementary material
Source: PubMed Central journal article supplement (PMC4430093)
Supplement: NIHMS685955-supplement-Table.pdf [file NIHMS685955-supplement-Table.pdf]

## Supplementary Online Content

Boyle CA, Perrin JM, Moyer VA. Use of clinical preventive services in infants, children, and adolescents. *JAMA*. doi:10.1001/jama.2014.12890.

**eTable.** Percentage of patients who are receiving selected recommended clinical preventive services for infants, children, and adolescents — United States

This supplementary material has been provided by the authors to give readers additional information about their work.

© 2014 American Medical Association. All rights reserved.

| <b>eTABLE. Percentage of patients who are receiving selected recommended clinical preventive services for infants, children, and adolescents — United States</b>                                                                                |                            |                                                                                                                 |
|-------------------------------------------------------------------------------------------------------------------------------------------------------------------------------------------------------------------------------------------------|----------------------------|-----------------------------------------------------------------------------------------------------------------|
| <b>Topic/Indicator (years received) and Data Sources</b>                                                                                                                                                                                        | <b>% receiving service</b> | <b>Clinical practice recommendation or guidelines for the preventive service – recommending organization(s)</b> |
| <b>Breastfeeding counseling (2010)</b><br><b>Data source: Pregnancy Risk Assessment Monitoring System</b>                                                                                                                                       |                            |                                                                                                                 |
| Women with recent live births who reported receiving any advice about breastfeeding during prenatal care visits                                                                                                                                 | 82.7                       | USPSTF/ACOG/AAP                                                                                                 |
| <b>Hearing screening and follow-up (2009–2010)</b><br><b>Data source: CDC Early Hearing Detection and Intervention Hearing Screening and Follow-up Survey</b>                                                                                   |                            |                                                                                                                 |
| Infants who failed their hearing screening and then received diagnostic testing needed to confirm hearing loss                                                                                                                                  | 50.3                       | USPSTF/AAP                                                                                                      |
| <b>Developmental screening (2007)</b><br><b>Data source: National Survey of Children’s Health</b>                                                                                                                                               |                            |                                                                                                                 |
| Children aged 10–47 months whose parents were asked by health-care providers to complete a formal screen for developmental delays during the preceding 12 months                                                                                | 21.1                       | AAP                                                                                                             |
| <b>Lead screening (2010)</b><br><b>Data source: CDC Child Blood Lead Surveillance System</b>                                                                                                                                                    |                            |                                                                                                                 |
| Children aged 1–2 years who were screened and reported to CDC for lead poisoning                                                                                                                                                                | 33.4                       | AAP                                                                                                             |
| <b>Vision screening (2009–2010)</b><br><b>Data source: Medical Expenditure Panel Survey</b>                                                                                                                                                     |                            |                                                                                                                 |
| Children aged 5 years who were reported by their parents to have ever had their vision checked by a doctor or other health provider                                                                                                             | 77.9                       | USPSTF/AA                                                                                                       |
| <b>Hypertension screening (2009–2010)</b><br><b>Data sources: National Ambulatory Medical Care Survey, National Hospital Ambulatory Medical Care Survey, and Medical Expenditure Panel Survey</b>                                               |                            |                                                                                                                 |
| Provider reported office-based and hospital outpatient department preventive care visits with documentation of blood pressure measurement among children and adolescents aged 3–17 years                                                        | 75.7                       | AAP                                                                                                             |
| Children and adolescents aged 3–17 years were reported by their parents or caregivers to have had their blood pressure measured by a doctor or other health provider at a nonemergency care physician or clinic visit during the preceding year | 69.6                       | AAP                                                                                                             |
| <b>Dental care and dental preventive services (2005–2010)</b><br><b>Data sources: Medical Expenditure Panel Survey and National Health and Nutrition Examination Survey</b>                                                                     |                            |                                                                                                                 |
| Persons aged ≤21 years who have visited the dentist during the preceding year (2009)                                                                                                                                                            | 43.8                       | AAP                                                                                                             |
| Persons aged ≤21 years who have received dental preventive services (topical fluoride, sealant, or both) during the preceding year (2009)                                                                                                       | 14.2                       | AAP                                                                                                             |
| Persons aged 5–19 years who have a dental sealant (2005–2010)                                                                                                                                                                                   | 31.3                       | AAP                                                                                                             |
| <b>Human papillomavirus (HPV) vaccination (2011)</b><br><b>Data source: National Immunization Survey – Teen</b>                                                                                                                                 |                            |                                                                                                                 |
| Adolescents females aged 13–17 years who have received ≥1 dose of the HPV vaccine                                                                                                                                                               | 53.0                       | ACIP                                                                                                            |
| Adolescent females aged 13–17 years who have received ≥3 doses of the HPV vaccine                                                                                                                                                               | 34.8                       | ACIP                                                                                                            |
| Adolescent males aged 13–17 years who have received ≥1 dose of the HPV vaccine                                                                                                                                                                  | 8.3                        | ACIP                                                                                                            |
| Adolescent males aged 13–17 years who have received ≥3 doses of the HPV vaccine                                                                                                                                                                 | 1.3                        | ACIP                                                                                                            |

| Topic/Indicator (years received) and Data Sources                                                                                                                                                                                           | % receiving service | Clinical practice recommendation or guidelines for the preventive service – recommending organization(s) |
|---------------------------------------------------------------------------------------------------------------------------------------------------------------------------------------------------------------------------------------------|---------------------|----------------------------------------------------------------------------------------------------------|
| <b>Tobacco use screening and cessation assistance (2004–2010)</b>                                                                                                                                                                           |                     |                                                                                                          |
| <b>Data source: National Ambulatory Medical Care Survey</b>                                                                                                                                                                                 |                     |                                                                                                          |
| Provider reported office-based outpatient visits with documentation of tobacco use status among persons aged 11–21 years                                                                                                                    | 69.5                | USPHS/AAP                                                                                                |
| Provider reported office-based outpatient visits with documentation of tobacco cessation assistance, including counseling and/or a prescription or order for a cessation medication among current tobacco users in persons aged 11–21 years | 19.8                | USPHS/AAP                                                                                                |
| <b>Chlamydia screening (2005–2010)</b>                                                                                                                                                                                                      |                     |                                                                                                          |
| <b>Data sources: National Survey of Family Growth and National Ambulatory Medical Care Survey</b>                                                                                                                                           |                     |                                                                                                          |
| Sexually active females aged 15–21 years who reported being tested for chlamydia during the preceding 12 months (2006–2010)                                                                                                                 | 40.0                | USPSTF/GAPS/AAP                                                                                          |
| Provider reported office-based ambulatory care setting visits with screening for chlamydia among females aged 15–21 years (2005–2010)                                                                                                       | 4.3                 | USPSTF/GAPS/AAP                                                                                          |
| <b>Reproductive health services (2006–2010)</b>                                                                                                                                                                                             |                     |                                                                                                          |
| <b>Data source: National Survey of Family Growth</b>                                                                                                                                                                                        |                     |                                                                                                          |
| Sexually experienced females aged 15–19 years who reported receiving a reproductive health service from a health-care provider during the preceding 12 months                                                                               | 76.5                | GAPS/AAP                                                                                                 |
| All females aged 15–19 years who reported receiving a reproductive health service from a health-care provider during the preceding 12 months                                                                                                | 43.9                | GAPS/AAP                                                                                                 |
| Sexually experienced males aged 15–19 years who reported receiving a reproductive health service from a health-care provider during the preceding 12 months                                                                                 | 62.5                | GAPS/AAP                                                                                                 |
| All males aged 15–19 years who reported receiving a reproductive health service from a health-care provider during the preceding 12 months                                                                                                  | 58.2                | GAPS/AAP                                                                                                 |

USPSTF: U.S. Preventive Services Task Force; AGOG: American Congress of Obstetricians and Gynecologists; AAP: American Academy of Pediatrics; USPHS: U.S. Public Health Service; ACIP: Advisory Committee on Immunization Practices; GAPS: Guidelines for Adolescent Preventive Services

© 2014 American Medical Association. All rights reserved.
